# Supplementary material for: Revisiting the Tigger Transposon Evolution Revealing Extensive Involvement in the Shaping of Mammal Genomes
Source: MDPI journal article supplement (doi:10.3390/biology11060921), 2022-06-16
Supplement: s1 [file s1]

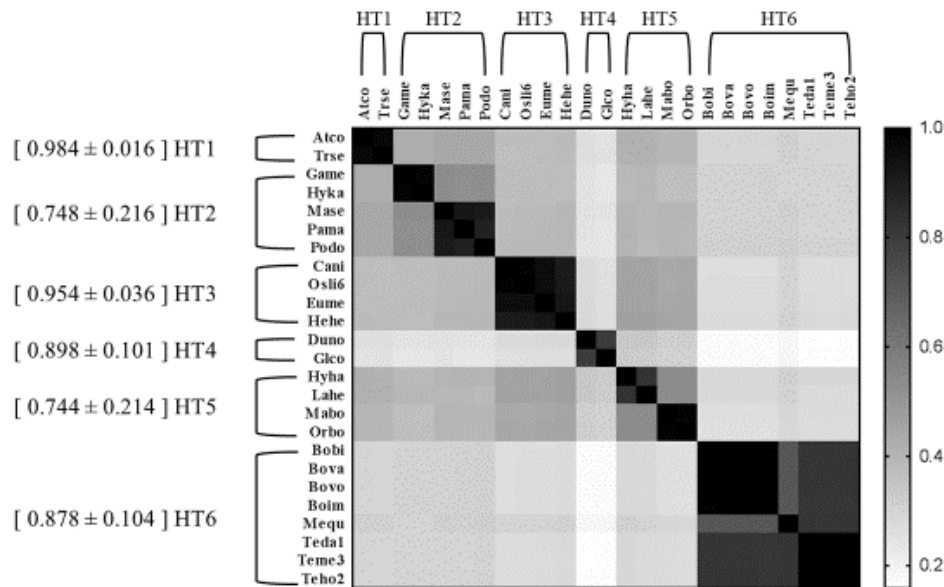

**Figure S4:** Sequence identities between *Tigger* elements among Arthropoda species. The sequence identities were measured by pairwise comparisons of *Tigger* CDS sequences (for species abbreviations refer to Supplementary table S1).
