# Supplementary material for: Revisiting the Tigger Transposon Evolution Revealing Extensive Involvement in the Shaping of Mammal Genomes
Source: MDPI journal article supplement (doi:10.3390/biology11060921), 2022-06-16
Supplement: s1 [file s1]

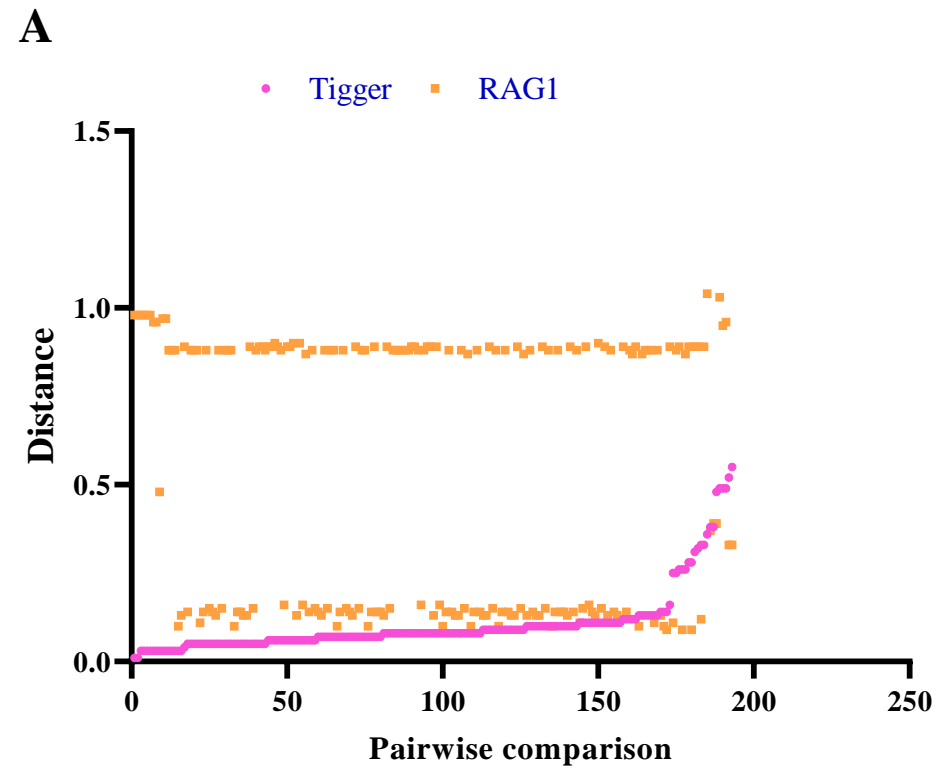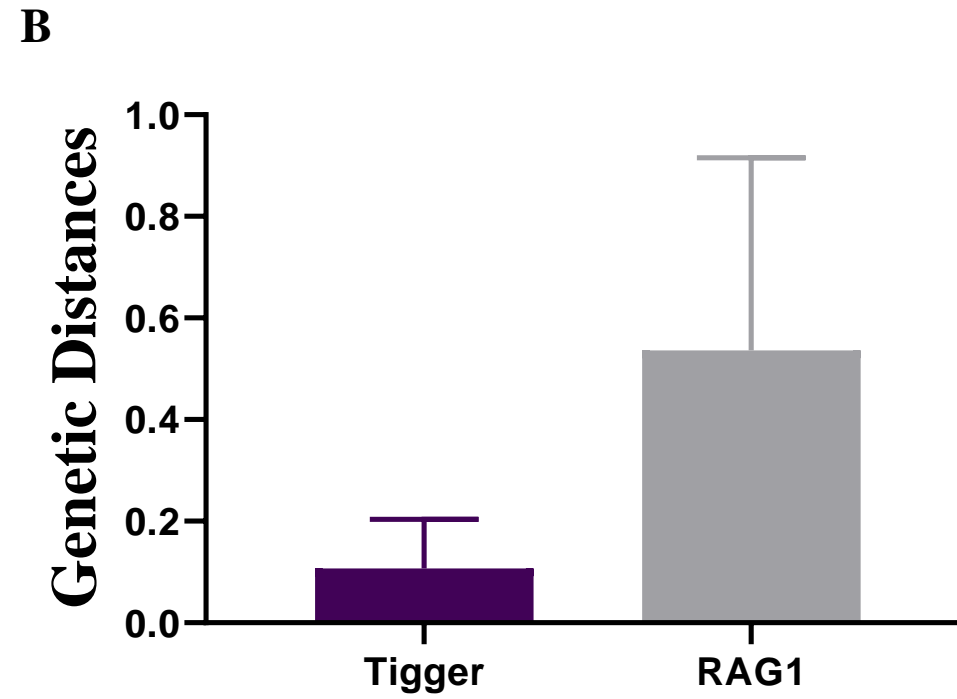

**Figure S5:** Genetic distances analysis for *Tigger* transposons and host genes. The graph illustrates the pairwise distances of *Tiggers* and RAG1 between vertebrates species that involved in HT events in this study. The distances were obtained from different classes or orders pairwise comparisons between the species in which *Tigger* was identified.

**A**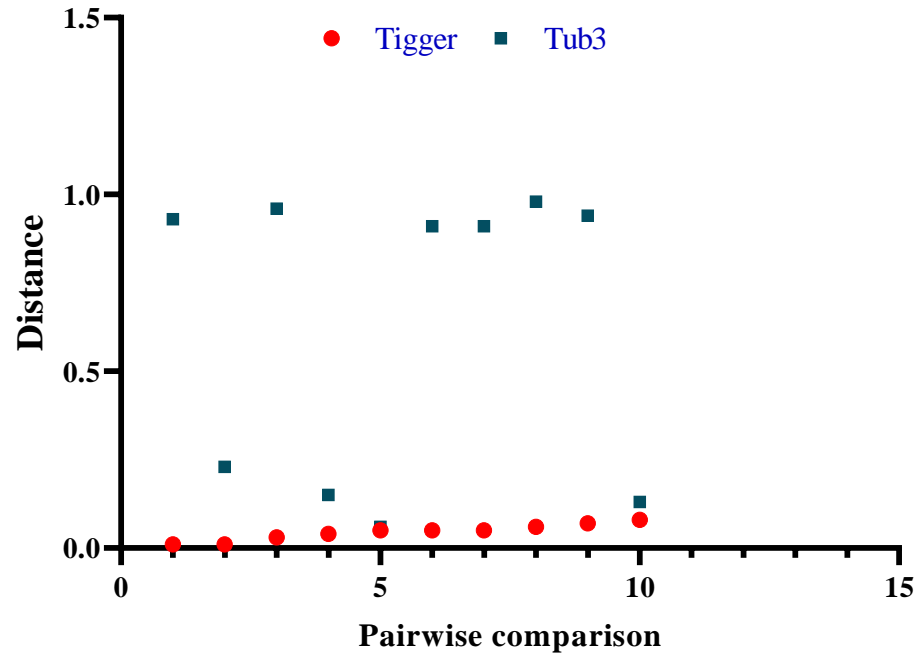**B**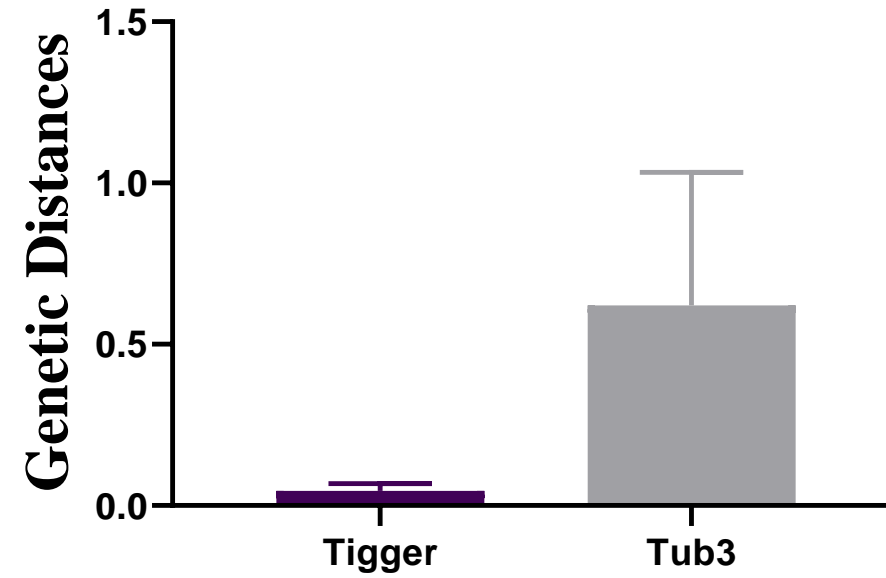

**Figure S6:** Genetic distances analysis for *Tigger* transposons and host genes. The graph illustrates the pairwise distances of *Tiggers* and *tub3* between invertebrates (arthropods) species that involved in HT events in this study. The distances were obtained from different classes or orders pairwise comparisons between the species in which *Tigger* was identified.
