# Supplementary material for: Revisiting the Tigger Transposon Evolution Revealing Extensive Involvement in the Shaping of Mammal Genomes
Source: MDPI journal article supplement (doi:10.3390/biology11060921), 2022-06-16
Supplement: s1 [file s1]

HT1

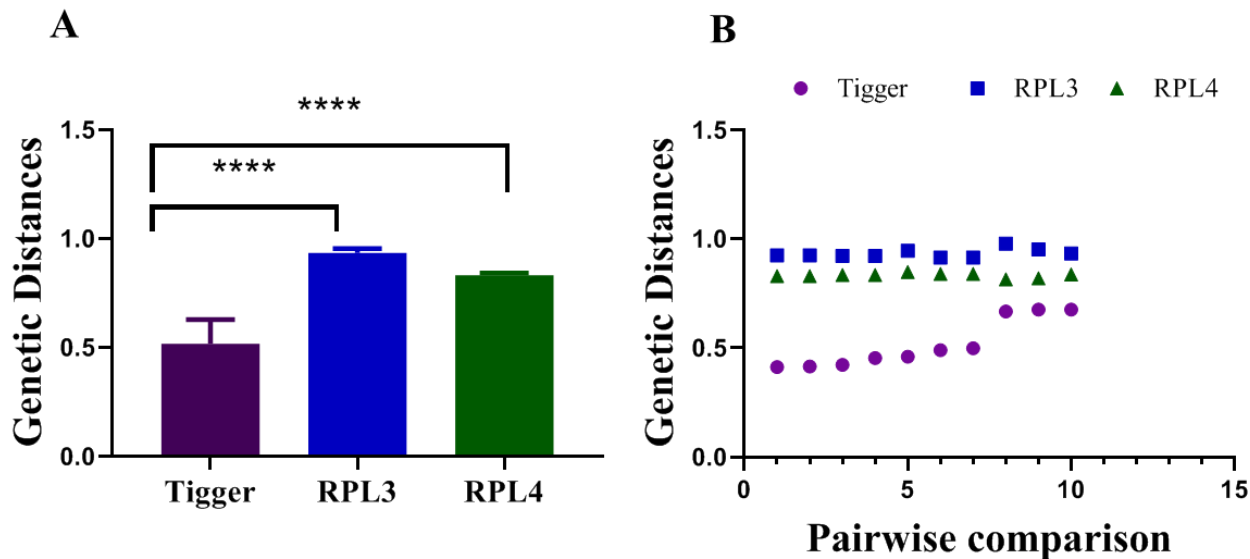

HT2

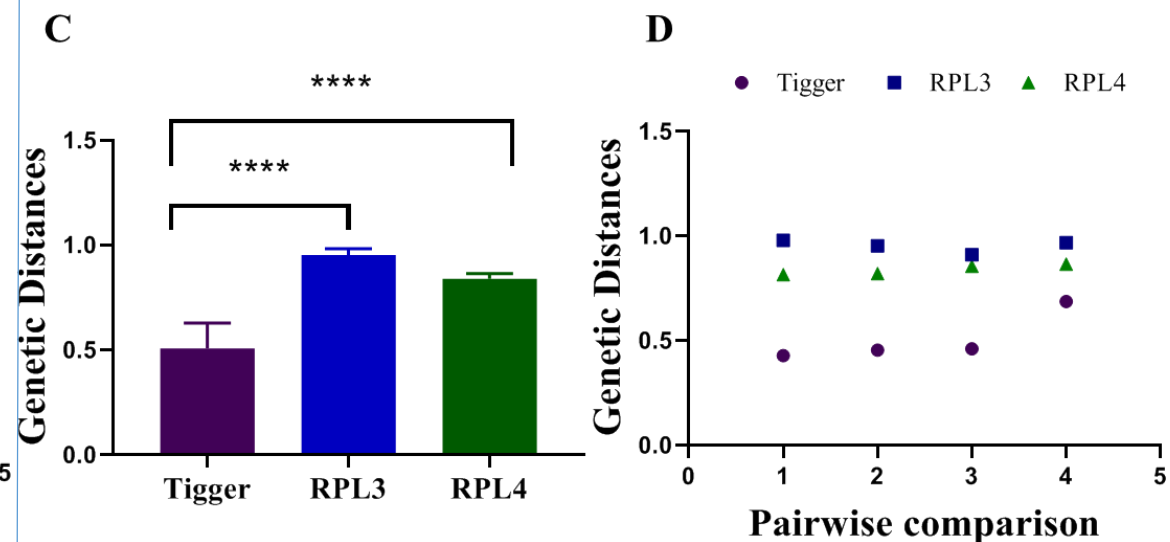

HT3

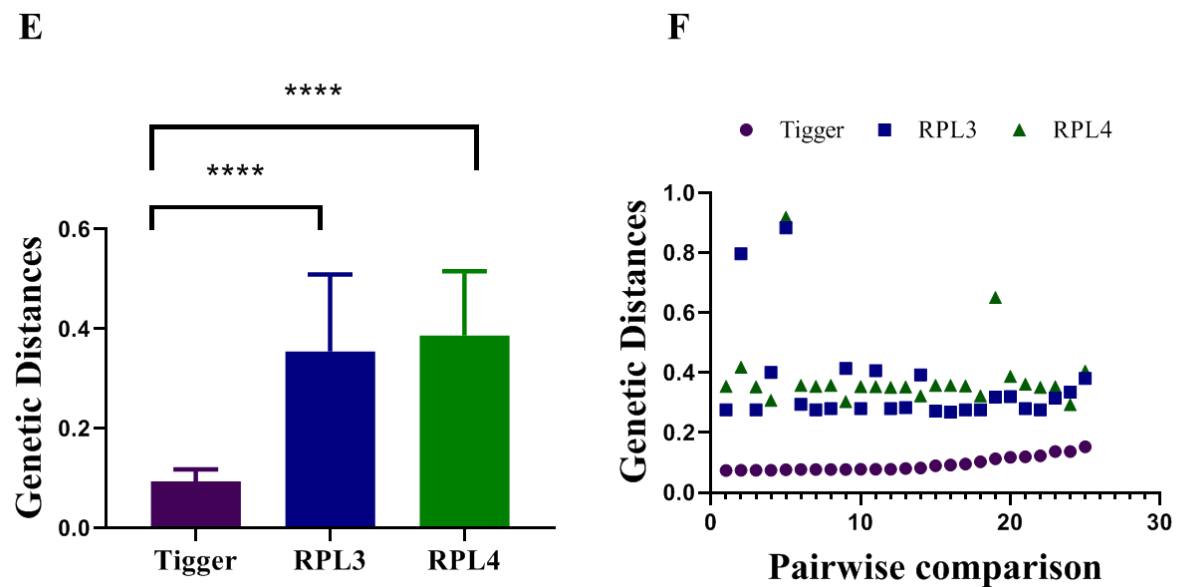

HT4

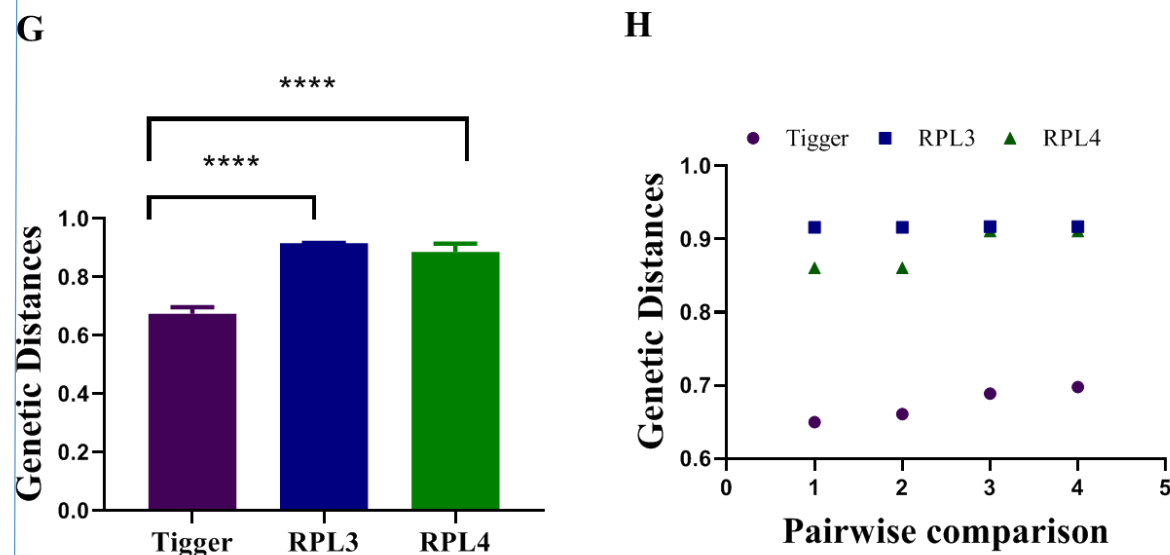

H

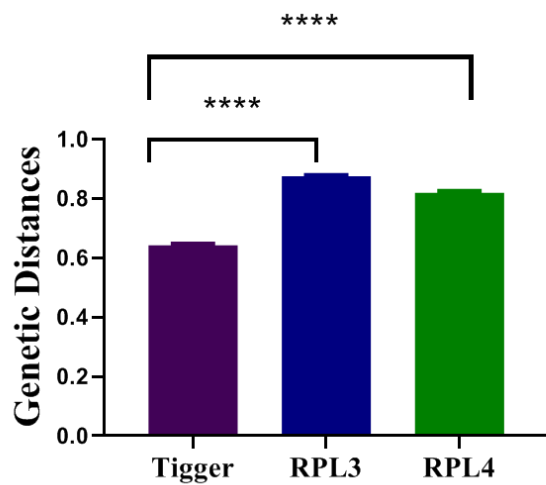

HT5

I

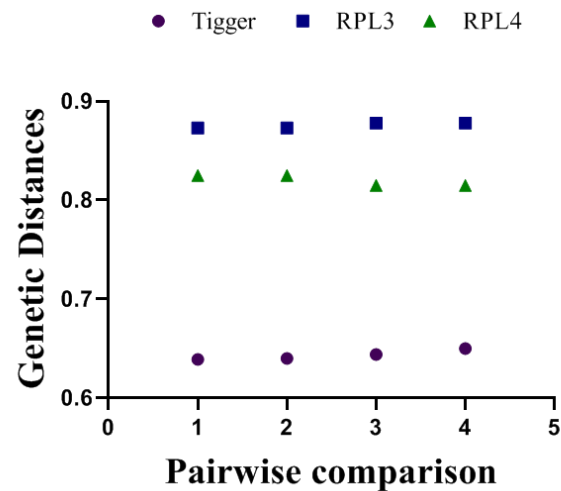

HT6

J

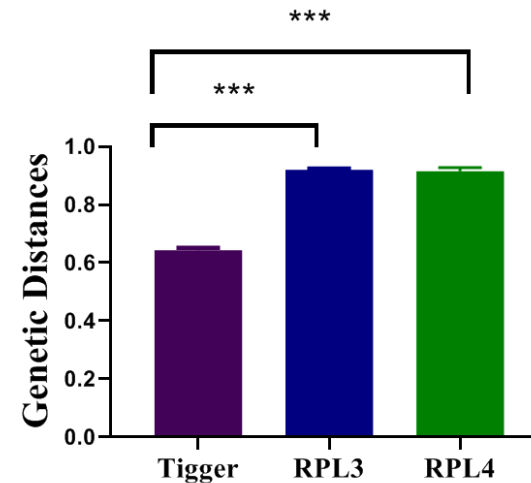

K

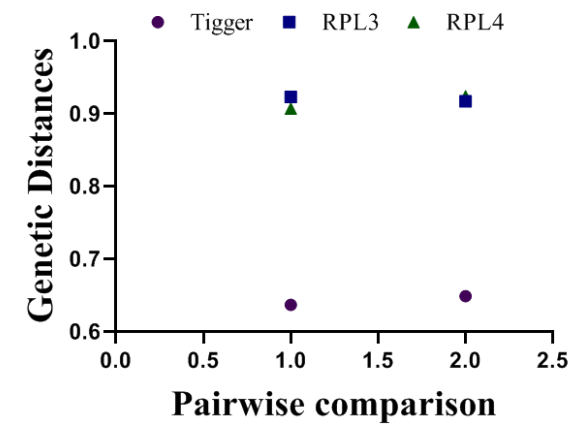

L

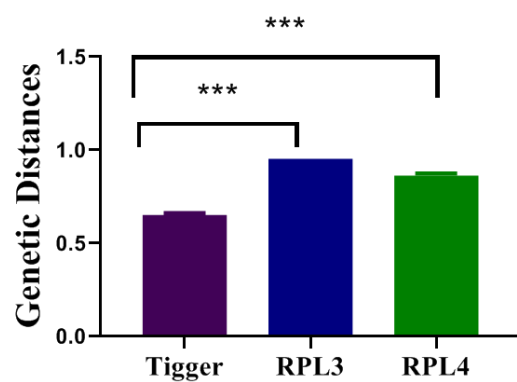

HT7

M

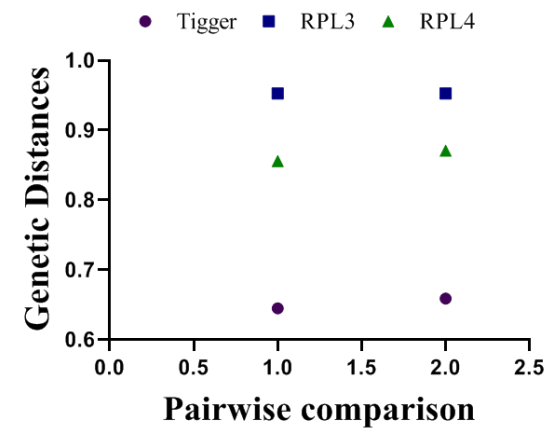

HT8

N

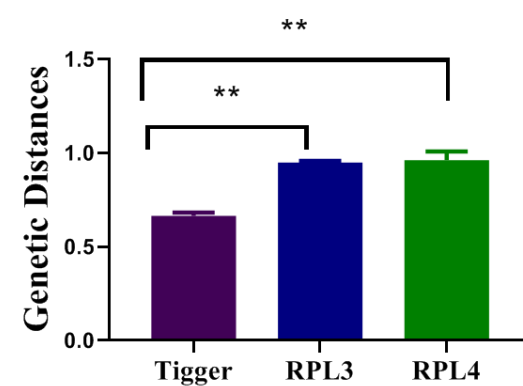

O

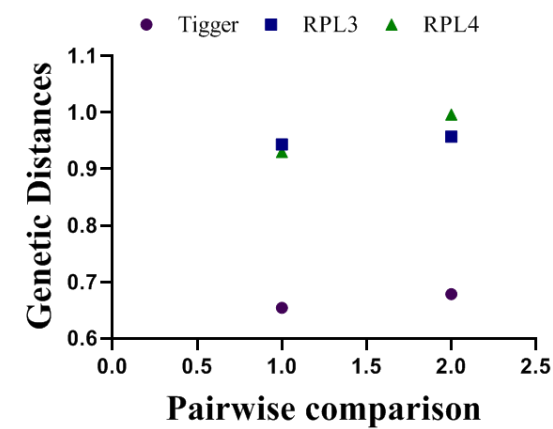

HT9

P

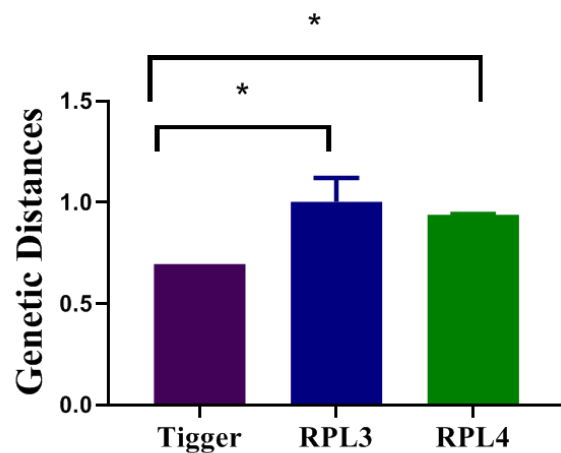

Q

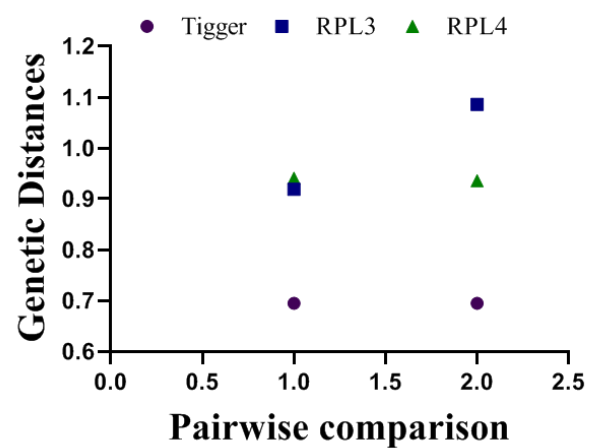

HT10

R

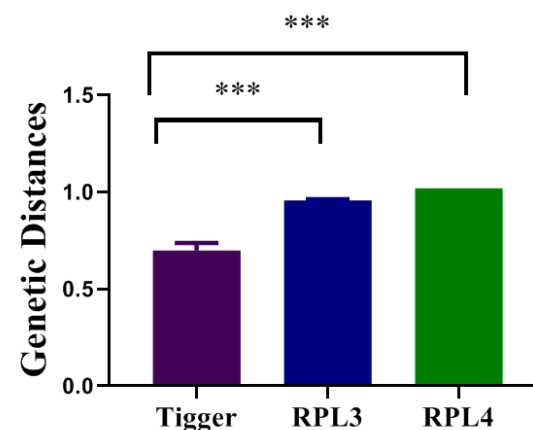

S

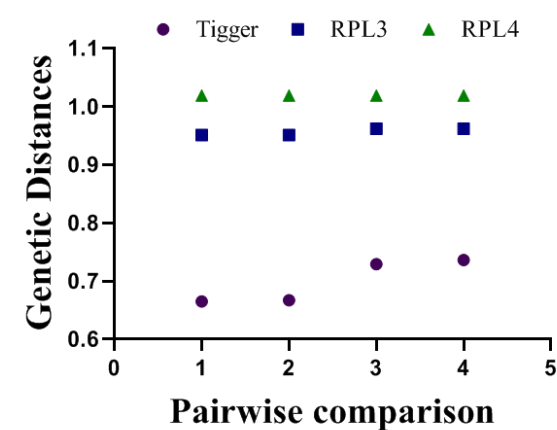

HT11

T

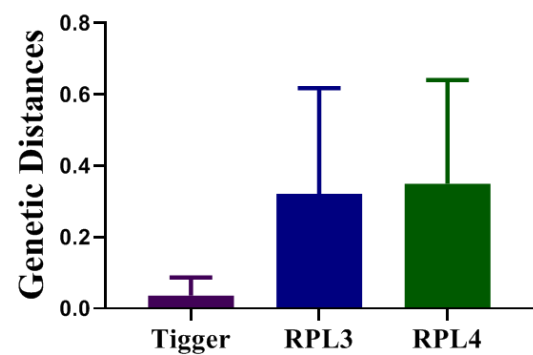

U

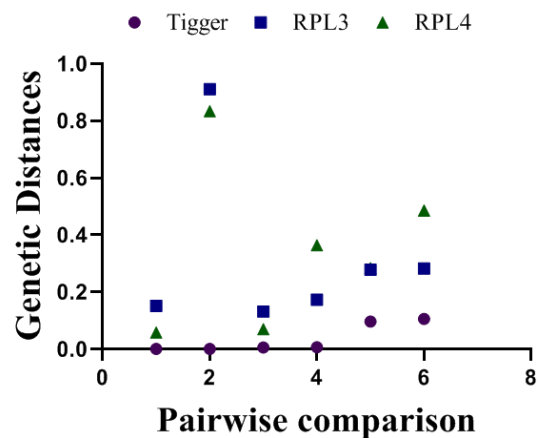

HT12

V

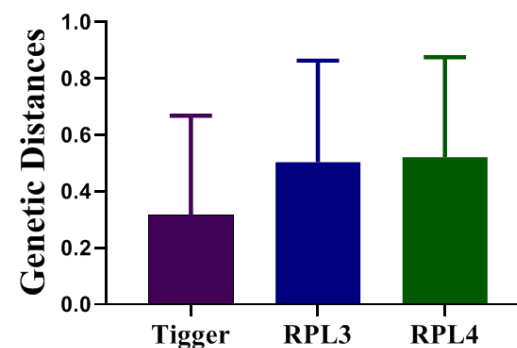

W

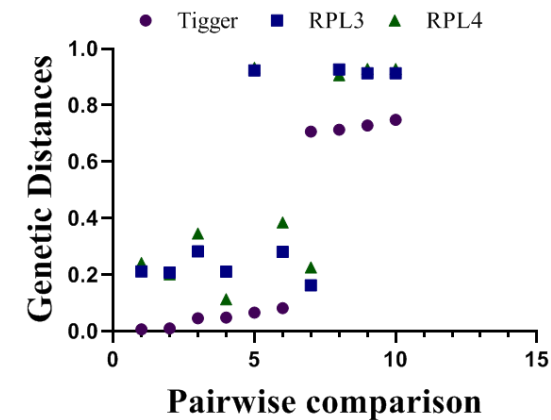

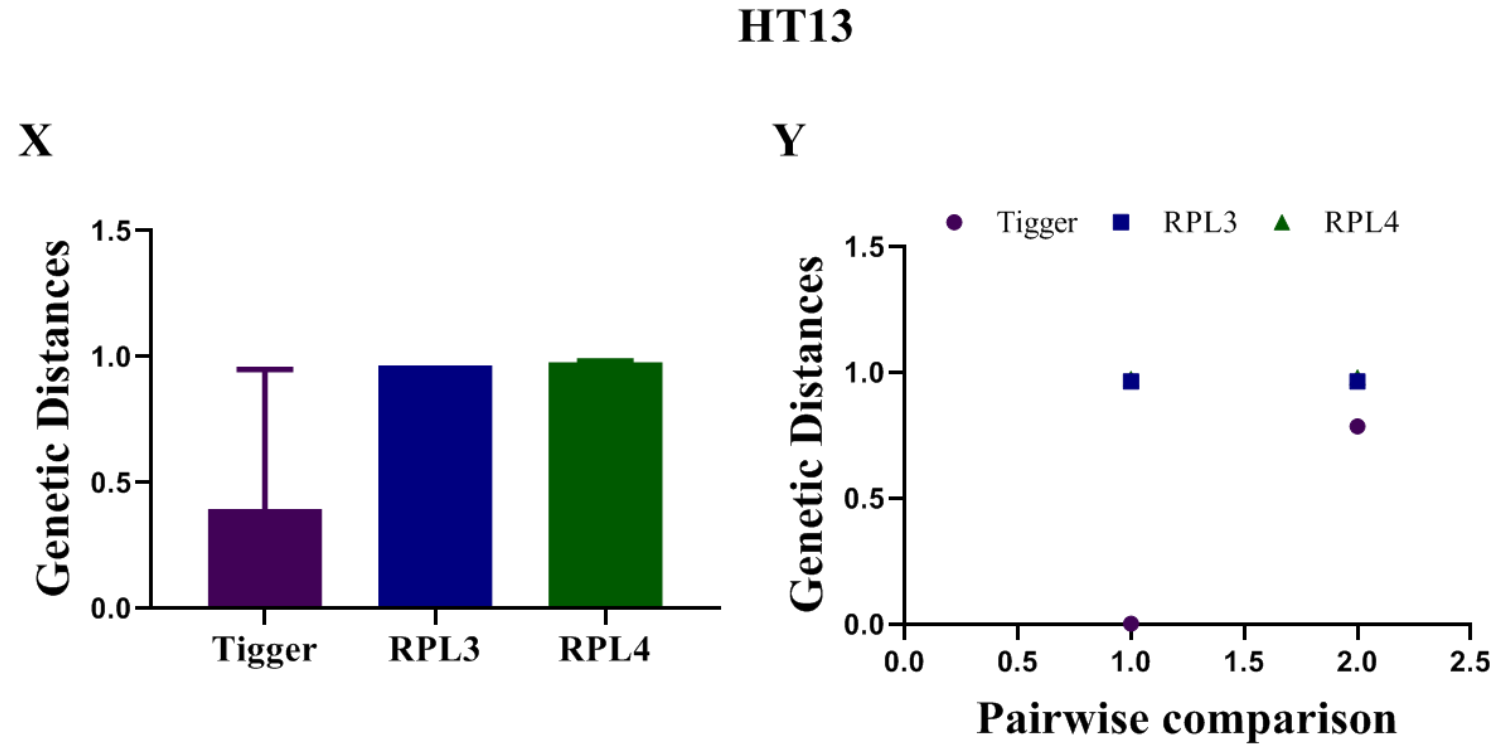

**Figure S2:** Genetic distances analysis for *Tigger* transposons and host genes. The graph illustrates the pairwise distances of *Tigger* and two host genes between the species involved in HT1, HT2, HT3, HT4, HT5, HT6, HT7, HT8, HT9, HT10, HT11, HT12, and HT13 events respectively. The distances were obtained from different phyla or classes pairwise comparisons between the species in which *Tigger* was identified.
