# Supplementary figures and images for: Revisiting the Tigger Transposon Evolution Revealing Extensive Involvement in the Shaping of Mammal Genomes
Source: MDPI journal article supplement (doi:10.3390/biology11060921), 2022-06-16

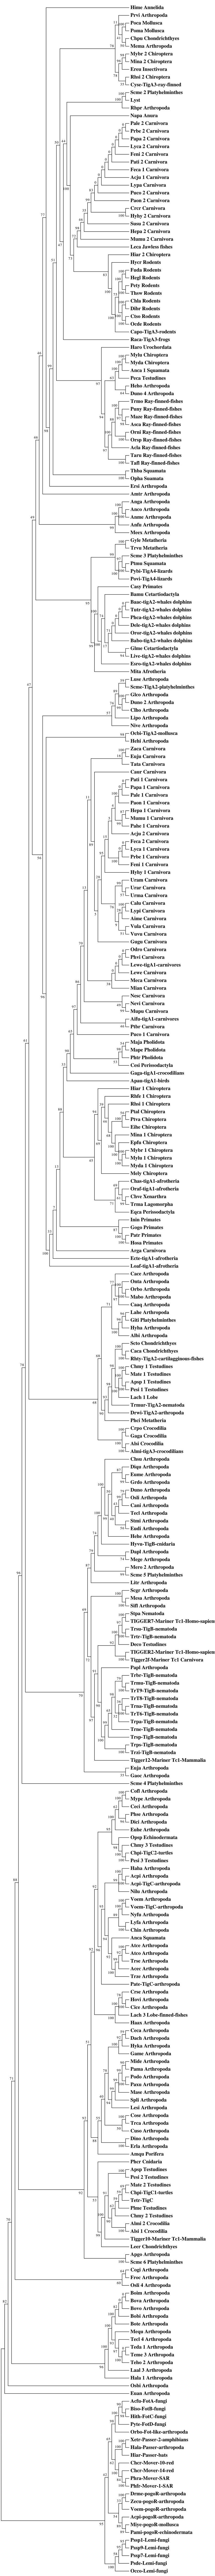

Supplement: s1 [file s1]
